# 1 Apical length governs computational diversity of L5 pyramidal 2 neurons

3

4 Alessandro R. Galloni<sup>1,2</sup>, Aeron Laffere<sup>1,3</sup> and Ede Rancz<sup>1\*</sup>

5 <sup>1</sup> The Francis Crick Institute, London, UK

6 <sup>2</sup> University College London, UK

7 <sup>3</sup> Birkbeck College, University of London, UK

8 \*Correspondence to [ede.rancz@crick.ac.uk](mailto:ede.rancz@crick.ac.uk)

9

## 10 Abstract

11 Anatomical similarity across the neocortex has led to the common assumption that the  
12 circuitry is modular and performs stereotyped computations. Layer 5 pyramidal neurons  
13 (L5PNs) in particular are thought to be central to cortical computation because of their  
14 extensive arborisation and nonlinear dendritic operations. Here, we demonstrate that  
15 computations associated with dendritic Ca<sup>2+</sup> plateaus in L5PNs vary substantially between  
16 the primary and secondary visual cortices. L5PNs in the secondary visual cortex show  
17 reduced dendritic excitability and smaller propensity for burst firing. This reduced excitability  
18 is correlated with shorter apical dendrites. Using numerical modelling, we uncover a  
19 universal principle underlying the influence of apical length on dendritic backpropagation and  
20 excitability, based on a Na<sup>+</sup> channel-dependent broadening of backpropagating action  
21 potentials. In summary, we provide new insights into the modulation of dendritic excitability  
22 by apical dendrite length and show that the operational repertoire of L5 neurons is not  
23 universal throughout the brain.

24

25

## 26 Introduction

27 The neocortex is thought to have a modular structure composed of ‘canonical circuits’  
28 performing stereotyped computations (Harris & Shepherd, 2015; Markram et al., 2015;  
29 Miller, 2016). Anatomical evidence supports the existence of repeating circuit architectures  
30 that display similar general features across species and brain areas (Carlo & Stevens, 2013;  
31 Douglas & Martin, 2004; Mountcastle, 1997). It is generally thought that these architectural  
32 motifs serve as a physical substrate to perform a small range of specific, canonical  
33 computations (Bastos et al., 2012; Braganza & Beck, 2018).

34 Pyramidal neurons are the main building blocks of these circuit motifs. Across brain areas  
35 and species, their biophysical attributes endow them with non-linear properties that allow  
36 them to implement a repertoire of advanced computations at the single cell level (Gidon et  
37 al., 2020; London & Häusser, 2005; Spruston, 2008). Layer 5 pyramidal neurons (L5 PNs) in  
38 particular provide a striking example of how dendritic properties can underlie circuit-level  
39 computations in a laminar circuit. Their dendritic supralinearities enable signal amplification  
40 and coincidence detection of inputs — a crucial operation to integrate feedforward and  
41 feedback streams that often send projections onto separate dendritic domains. In these  
42 cells, a single backpropagating action potential (bAP), when combined with distal synaptic  
43 input, can trigger a burst of somatic action potentials. The crucial mechanism underlying this  
44 supralinear phenomenon is the all-or-none dendritic  $\text{Ca}^{2+}$  plateau (M. E. Larkum, Kaiser, &  
45 Sakmann, 1999; Matthew E. Larkum, Zhu, & Sakmann, 1999).

46 Morphology and intrinsic properties have a profound influence on neuronal excitability.  
47 Dendritic topology and the electrical coupling between the soma and dendrites is thought to  
48 be particularly crucial for determining a neuron’s integrative properties (Mainen & Sejnowski,  
49 1996; Schaefer, Larkum, Sakmann, & Roth, 2003; van Ooyen, Duijnhouwer, Remme, & van  
50 Pelt, 2002; Vetter, Roth, & Hausser, 2001). Recent experimental work has shown that there  
51 can be substantial variation in intrinsic properties of L5 neurons depending on the location  
52 within a cortical area or on the species they are recorded from (Beaulieu-Laroche et al.,  
53 2018; Fletcher & Williams, 2019). However, it is often assumed that pyramidal neurons have  
54 robust enough properties across cortical areas and brain structures to support similar  
55 computations (Bastos et al., 2012; Hawkins, Ahmad, & Cui, 2017; M. Larkum, 2013; Shipp,  
56 2016). For instance, analogous to L5 PNs, hippocampal pyramidal neurons also display  
57 dendritic  $\text{Ca}^{2+}$  APs that support coincidence detection of distal and proximal inputs (Jarsky,  
58 Roxin, Kath, & Spruston, 2005).

59 If L5 pyramidal neurons indeed have a common repertoire of operations in support of  
60 canonical computations, one would expect the same cell type in adjacent and closely related  
61 areas to exhibit the same computational repertoire. Here we have studied the bursting  
62 properties of thick-tufted L5 neurons (ttL5) in mouse primary and secondary visual cortices

63 (V1 and V2m). Through systematic and rigorously standardized experiments, we found  
64 fundamentally different operation patterns linked to morphology in the two brain areas.  
65 Through computational modelling, we reveal new insights into biophysical mechanism  
66 linking excitability to morphology, which is able to account for this difference. Our results  
67 question the notion of a common operational repertoire in pyramidal neurons and thus  
68 cortical canonical computations as well.

69

## 70 **Results**

### 71 **Thick-tufted L5 neurons in V2m lack BAC firing**

72 We made whole-cell patch clamp recordings from ttL5 pyramidal neurons in V1 and V2m in  
73 acutely prepared mouse brain slices. To ensure consistency in cell type, recordings were  
74 restricted either to neurons projecting to the lateral posterior nucleus of thalamus, identified  
75 using retrograde labelling with cholera toxin subunit B (**Supplementary Figure 1**), or to  
76 neurons labelled in the Glt25d2-Cre mouse line (Groh et al., 2010). In addition, we were able  
77 to confirm the characteristic morphological features of ttL5 neurons in a subset of the  
78 recorded neurons using biocytin reconstructions. We were thus able to maintain cortical area  
79 as the primary variant when comparing V1 and V2m neurons.

80

81 To reproduce the conditions required for triggering BAC firing, we stimulated synaptic inputs  
82 near the distal tuft in L1 using an extracellular electrode in conjunction with somatic  
83 stimulation through the recording electrode (**Fig. 1a**). To avoid recruiting inhibitory inputs  
84 during the extracellular stimulation and create the most favourable conditions to enable BAC  
85 firing (Perez-Garci, Gassmann, Bettler, & Larkum, 2006), we added the competitive GABA<sub>B</sub>  
86 receptor antagonist CGP52432 (1 μM) to the extracellular solution. Extracellular current  
87 pulses in L1 were adjusted to evoke either a subthreshold EPSP or a single action potential  
88 at the soma. Somatic injection of a 5 ms depolarizing current pulse through the recording  
89 electrode was used to trigger single APs. In V1 neurons, combined stimulation (with the L1  
90 input triggered at the end of the somatic pulse) could evoke a prolonged plateau potential  
91 resulting in a burst of 3 APs. We repeated these experiments in ttL5 pyramidal neurons  
92 located in V2m under the same recording conditions. Upon coincident somatic AP and  
93 extracellular L1 stimulation, BAC firing was almost never observed in V2m, suggesting a  
94 much-reduced dendritic excitability in V2m neurons. For the purposes of these experiments,  
95 we defined as “supralinear” any cell in which three or more APs could be evoked following  
96 combined somatic and L1 stimulation (each evoking no more than one AP individually).

97 Supralinearity was observed in half the recorded V1 neurons (10/20), while neurons in V2m  
 98 showed an almost total lack of supralinearity (1/19, **Fig. 1b**).

99

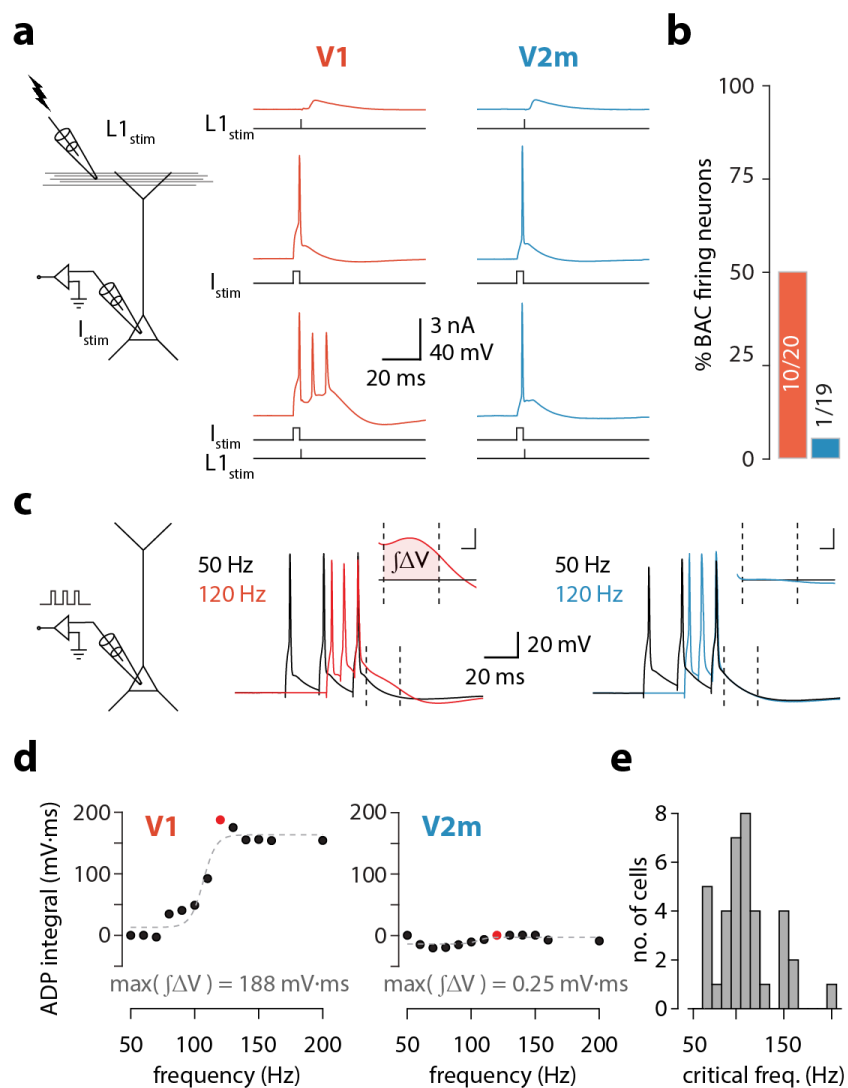

100

101 **Figure 1. V2m neurons are less prone to burst than in V1.**

102 **a.** *Left:* diagram of experimental configuration. *Right:* example traces during BAC firing protocol,  
 103 recorded from V1 (red) and V2m (blue) ttL5 neurons. **b.** Proportion of supralinear cells in V1 and V2m  
 104 **c.** *Left:* diagram of experimental configuration. *Right:* example traces of V1 and V2m ttL5 neurons  
 105 stimulated with 50 Hz and 120 Hz AP trains. Note the sustained after-depolarization following the 120  
 106 Hz spike train in the V1 neuron. *Inset:* ADP measured as the area between the 50 Hz trace and the  
 107 higher frequency trace following the last spike. Inset scale bar: 5 ms x 5 mV. **d.** Quantification of ADP  
 108 area at each measured frequency for the example neurons in **c**. The peak integral value is highlighted  
 109 in red. **e.** Histogram of results across all recorded cells with defined critical frequency.

110 **Thick-tufted L5 neuron in V2m lack a critical frequency ADP**

111 To further investigate the prevalence of dendritic supralinearities in ttL5 neurons across  
 112 visual cortices, we recorded another hallmark of dendritic  $\text{Ca}^{2+}$  plateaus: a prominent

113 somatic ADP following a high-frequency train of somatic APs (M. E. Larkum et al., 1999;  
114 Shai, Anastassiou, Larkum, & Koch, 2015). We recorded the somatic membrane potential  
115 from ttL5 neurons and evoked three action potentials using 3 ms pulses of somatic current  
116 injection at frequencies ranging from 50 Hz to 200 Hz in 10 Hz increments (**Fig. 1c**). In V1  
117 neurons, increasing the AP frequency above a critical frequency typically resulted in a  
118 sudden increase in the ADP (**Fig. 1c, middle**). However, when recording in V2m under the  
119 same experimental conditions, there was usually no change in ADP, even at firing  
120 frequencies as high as 200 Hz (**Fig. 1c, right**). To quantify this effect, we aligned the peaks  
121 of the last AP for each frequency and measured the area of the ADP difference between the  
122 50 Hz trace and the higher frequency traces in a 20 ms window (4–24 ms) following the last  
123 AP (**Fig. 1c, inset**). This measure of ADP increased sharply above a critical frequency and  
124 was often largest around the value of this frequency (**Fig. 1d**). The mean critical frequency  
125 across all cells in both V1 and V2m was  $110.8 \pm 29.6$  Hz (SD,  $n = 37$ , excluding cells that did  
126 not have a critical frequency, **Fig. 1e**).

127  
128 Next, we measured the maximal ADP integral value for each cell (**Fig. 2a**), regardless of the  
129 presence of a critical frequency. Neurons in V2m had significantly smaller ADP area (V1  
130 mean =  $91 \pm 50$  mV\*ms, SD,  $n = 41$ ; V2m mean =  $42 \pm 33$  mV\*ms, SD,  $n = 49$ ;  $p = 4.54 \times 10^{-6}$ ,  
131 two-sample Kolmogorov-Smirnov test), reflecting that most of these cells lacked a critical  
132 frequency altogether. The extracellular artificial cerebrospinal fluid (ACSF) contained either  
133 1.5 or 2 mM CaCl<sub>2</sub>. As there was no statistically significant difference between the two  
134 conditions in either V1 or V2m ( $p > 0.05$ , two-sample Kolmogorov-Smirnov test;  
135 **Supplementary Figure 2**), we pooled all recordings. Similarly, as there was no significant  
136 difference in the ADP measure across V2m neurons labelled retrogradely or by the Glt25d2-  
137 Cre line ( $p = 0.617$ , two-sample Kolmogorov-Smirnov test, **Supplementary Figure 3**), we  
138 pooled these two populations. To obtain an unbiased count of cells showing supralinearity,  
139 we separated the unlabelled maximum ADP values pooled from both V1 and V2m into two  
140 groups using k-means clustering (with  $k = 2$ ). N.B. that in this experiment the definition of  
141 supralinear classification differed from the experiments of Fig. 1a. The percentage of  
142 neurons classified as supralinear (summarized in **Fig. 2b**) was more than three times higher  
143 in V1 than in V2m, regardless of the specific supralinearity measure.

144 In both the BAC firing and ADP experiments mentioned above, bursting was typically also  
145 apparent in the spiking response to a long (500 ms) depolarization at the soma. While all  
146 ttL5 neurons are generally characterized by a spike doublet at the beginning of the current  
147 step, in bursting neurons there is also a critical current step above which the initial spike  
148 burst is substantially larger, usually with 3 or 4 spikes followed by a deeper  
149 afterhyperpolarization (**Supplementary Figure 4**).

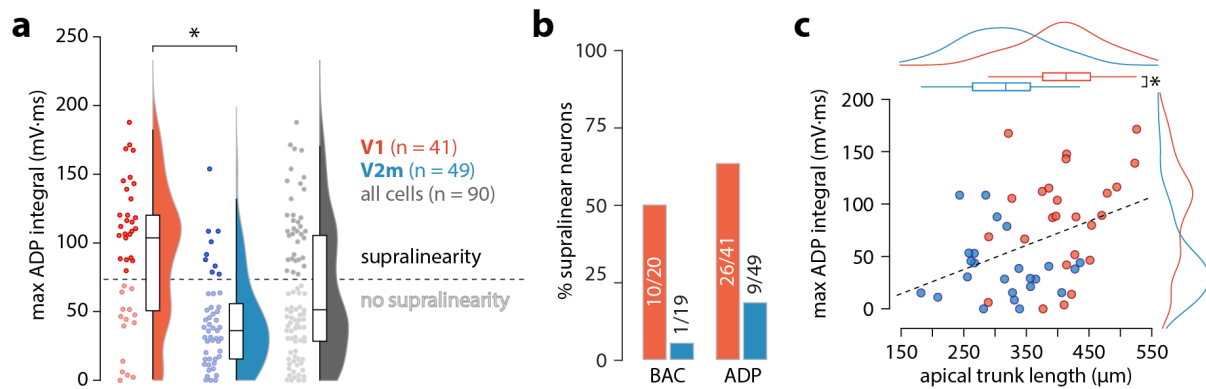

150

151 **Figure 2. Excitability correlates with apical trunk length**

152 **a.** Summary data of peak ADP integral values for all recorded neurons. The dashed line indicates the  
 153 division between the two groups of cells classified through k-means clustering, drawn halfway  
 154 between the cell with the lowest maximum ADP in the “supralinearity” cluster and the cell with the  
 155 highest value in the “no supralinearity” cluster. **b.** Proportion of supralinear cells in V1 and V2m. **c.**  
 156 Length of the apical trunk (soma to main bifurcation) plotted against the corresponding maximum ADP  
 157 integral values. Dashed line is a linear fit; curves at the top and right are kernel density plots of the  
 158 two variables in V1 and V2m.

159

160 These results show a much-diminished dendritic excitability, and as such different integrative  
 161 properties, in V2m ttL5 neurons compared to V1 under the same conditions and in the same  
 162 operational ranges. Previous research has indicated the length of the apical trunk as a  
 163 possible factor involved in determining the dendritic excitability of ttL5 neurons in V1  
 164 (Fletcher & Williams, 2019). To test this, we reconstructed the apical trunk of 22 V1 and 26  
 165 V2m neurons from those recorded. Apical trunk lengths were significantly shorter in V2m  
 166 than in V1 (V1 mean =  $409 \pm 64 \mu\text{m}$ , SD,  $n = 22$ ; V2m mean =  $313 \pm 65 \mu\text{m}$ , SD,  $n = 26$ ;  $p =$   
 167  $4.26 \cdot 10^{-6}$ , two-sample t-test, **Fig. 2c**). Additionally, there was a correlation between maximal  
 168 ADP integral values and apical trunk length across the two populations ( $p = 5.37 \cdot 10^{-3}$ ; F-  
 169 test). These results suggest that there may be a surprisingly counter-intuitive interaction  
 170 between apical trunk length and dendritic excitability—the longer the trunk, the more  
 171 excitable the neuron.

172 **BAC firing is absent in short ttL5 models**

173 To investigate possible mechanisms underlying the dependence of bursting on apical trunk  
 174 length, we ran numerical simulations in conductance-based compartmental models of ttL5  
 175 neurons. We first probed BAC firing in a morphologically detailed model developed by Hay  
 176 et al. (Hay, Hill, Schürmann, Markram, & Segev, 2011), using the model parameters  
 177 (biophysical model 3) and morphology (cell #1) favoured for reproducing BAC firing. As in  
 178 the original paper, BAC firing was triggered by injecting a 0.5 nA current at the apical  
 179 bifurcation coupled to a somatic action potential evoked by square-pulse current injection at

180 the soma. Mirroring the responses seen in the subset of strongly bursting ttL5 neurons,  
181 coincident stimulation triggered BAC firing in the detailed model (**Fig. 3a, left**). We then  
182 applied the same model to an example V2m morphology with a shorter apical dendrite. The  
183  $\text{Ca}^{2+}$  channel hotspot was moved to the new apical branch point (350–450  $\mu\text{m}$  from the  
184 soma vs 685–885  $\mu\text{m}$  in the long morphology). The amplitude of the dendritic current  
185 injection (0.194 nA) was scaled so as to obtain the same depolarization amplitude at the  
186 bifurcation in both model cells. With this morphology, coincident tuft and somatic stimulation  
187 evoked only a single somatic spike and did not trigger a dendritic  $\text{Ca}^{2+}$  plateau (**Fig. 3a,**  
188 **right**). To ensure comparability between the long and short morphology, BAC firing was  
189 probed with both 100  $\mu\text{m}$  and 200  $\mu\text{m}$   $\text{Ca}^{2+}$  channel hotspot size. We did not observe any  
190 qualitative effect of hotspot size in either model (**Supplementary Figure 5**). To test if  $\text{Ca}^{2+}$   
191 plateaus were at all possible in the short neuron model, we stimulated the short neuron with  
192 a large current injection (0.5 nA) at the dendritic electrode. While the resulting dendritic  
193 potential was substantially larger, showing activation of calcium conductances, it resulted in  
194 only a small depolarization at the soma. Even when combining the large current injection  
195 with a somatic spike, no spike burst could be triggered (**Supplementary Figure 6**).

196

197 To explore the sensitivity of  $\text{Ca}^{2+}$  plateaus to dendritic  $\text{Ca}^{2+}$  channel density in the long and  
198 short neurons, we scaled the sum  $\text{Ca}^{2+}$  conductance ( $g_{\text{Ca}}$ ) between 0 and 8 times the  
199 original values. To minimize the number of variables, when scaling the relative  $g_{\text{Ca}}$  we kept  
200 the ratio of the two channels (low- and high-voltage activated) constant. In the long  
201 morphology the integral of the distal dendritic voltage, acting as an indicator of the large and  
202 sustained depolarization during a  $\text{Ca}^{2+}$  plateau, increased proportionally to  $g_{\text{Ca}}$ . In the short  
203 morphology, however, the voltage integral stayed constant across all  $g_{\text{Ca}}$  values (**Fig. 3b**).  
204 This indicates that, although the size of a  $\text{Ca}^{2+}$  plateau depends on  $g_{\text{Ca}}$  in long neurons, in  
205 short neurons there is no  $\text{Ca}^{2+}$  channel activation and the magnitude of the voltage integral  
206 therefore does not depend on  $g_{\text{Ca}}$ .

207

208 To be able to vary dendritic length across a continuous range of values, we turned to a  
209 reduced ttL5 model based on Bahl et al. (Bahl, Stemmler, Herz, & Roth, 2012). The  
210 simplicity of this model has the added benefit of reducing the number of variables, allowing  
211 us to explore general principles of dendritic voltage propagation with more clarity. As with  
212 the morphologically detailed model, the reduced model with the original published  
213 parameters displayed BAC firing triggered by coincident tuft and somatic stimulation (**Fig.**  
214 **3c, left**). Shortening the apical trunk was sufficient to eliminate this response (**Fig. 3c,**  
215 **right**).

216

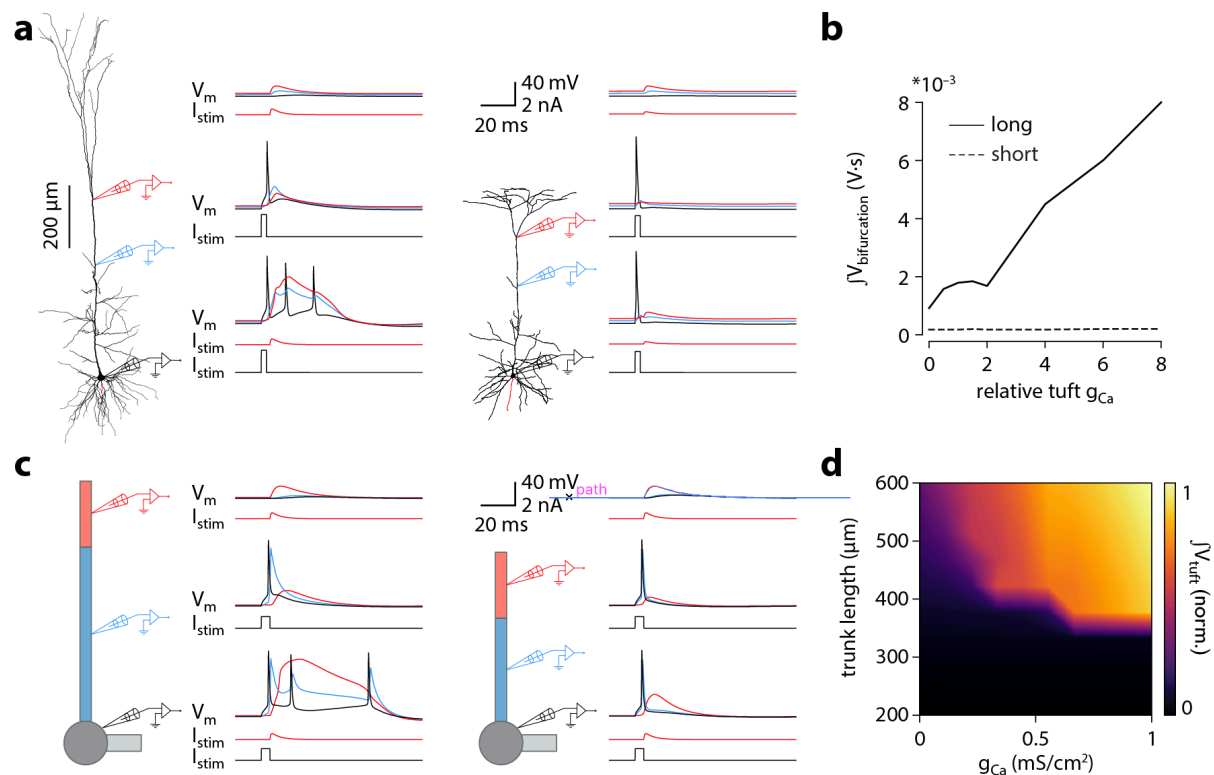

217

218 **Figure 3. Shorter model neurons are less prone to burst.**

219 **a. Left:** detailed morphology of a ttL5 pyramidal neuron from the model favoured by Hay et al. for  
 220 reproducing BAC firing. **Right:** reconstructed morphology of a ttL5 neuron recorded in V2m. Injected  
 221 current and recorded voltage traces are shown for the soma (black), the apical trunk (blue, 400 and  
 222 200  $\mu\text{m}$ ), and the main bifurcation (red, 620 and 370  $\mu\text{m}$ ) under three different stimulation paradigms.  
 223 **b.** Integral of voltage at the branch point during coincident somatic and branch point stimulation,  
 224 plotted against relative  $g_{Ca}$ . **c. Left:** diagram of the reduced neuron model. Apical trunk length 800  $\mu\text{m}$ .  
 225 Injected current and recorded voltage traces as in **a**. **Right:** Same for a version of the reduced model  
 226 modified to have an apical trunk length of 200  $\mu\text{m}$ . **d.** Heat map representing the normalised tuft  
 227 voltage integral during combined somatic and tuft stimulation in the reduced model, plotted against  
 228 the absolute density of  $Ca^{2+}$  channels in the tuft compartment and the length of the apical trunk  
 229 compartment. Default  $g_{Ca} \cong 0.45 \text{ mS}/\text{cm}^2$ .

230

231 We explored the dependence of BAC firing on apical trunk length and  $g_{Ca}$  by measuring the  
 232 time-integral of tuft voltage as an indicator of  $Ca^{2+}$  plateau potentials (**Fig. 3d**). The presence  
 233 of a  $Ca^{2+}$  plateau depended strongly on apical trunk length and was only sensitive to  $g_{Ca}$   
 234 above a critical length of approximately 350  $\mu\text{m}$  ( $\cong 0.35 \lambda$ ). Below this length, no  $Ca^{2+}$   
 235 plateaus were triggered regardless of how high  $g_{Ca}$  was set to. These experiments show that  
 236 a reduced model can also reproduce our results, allowing us to explore and dissect the  
 237 underlying parameters in more detail.

238



## 239 Active propagation enhances voltage in long dendrites

240 To obtain a mechanistic understanding of what causes the length dependence of bursting,  
 241 we made recordings from the final segment of the apical trunk as well as the tuft using the  
 242 reduced model of Fig. 3c. To recreate the experimental conditions of Fig. 1b, we triggered 3  
 243 spikes at 100 Hz through a somatic electrode. As with coincident bAP and tuft input,  
 244 increasing the length of the apical trunk facilitated dendritic  $\text{Ca}^{2+}$  plateau initiation (**Fig. 4a**).  
 245 Interestingly, the width and peak voltage in the tuft increased steadily with dendritic length  
 246 (**Fig. 4b,c**), even in the absence of  $\text{Ca}^{2+}$  currents ( $g_{\text{Ca}} = 0$ ). In the presence of voltage-gated  
 247  $\text{Ca}^{2+}$  channels, the increased amplitude of bAPs triggered a large all-or-none  $\text{Ca}^{2+}$  plateau  
 248 above a certain threshold length.  
 249

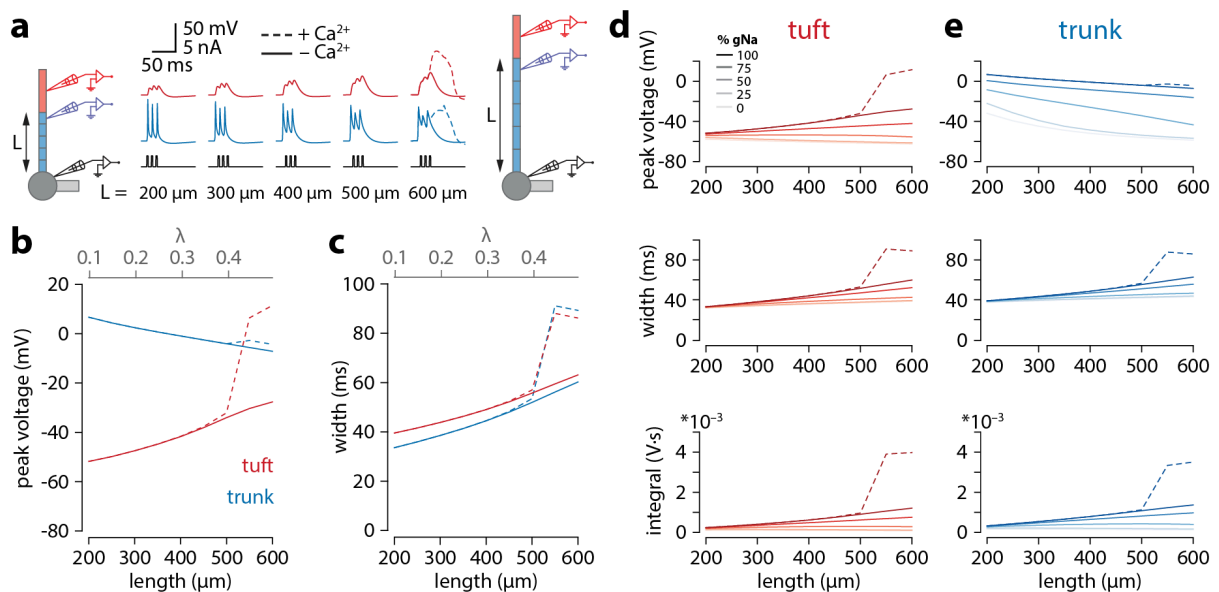

250

## 251 Figure 4. Tuft voltage increases with trunk length due to the widening of bAPs.

252 **a.** Schematic of the simulation: stimulation site in the somatic compartment, and recording sites at the  
 253 distal end of the apical trunk (blue) and in the centre of the tuft (red). Stimulus shown in black. Solid  
 254 lines:  $g_{\text{Ca}} = 0$ ; dashed lines: original  $g_{\text{Ca}}$ . **b.** Peak voltage reached in trunk (blue) and tuft (red) for a  
 255 range of simulations with different trunk lengths. Length constant  $\lambda = 1009 \mu\text{m}$ . **c.** Same as in **b** but  
 256 plotting the width of the depolarization measured 2 mV above baseline. **d,e.** Peak voltage, width and  
 257 integral values measured in the trunk and tuft for dendrites containing different  $\text{Na}^+$  channel densities  
 258 in the apical trunk.

259

260 We found that bAP amplitude in the tuft increased as a function of apical trunk length despite  
 261 a decreasing bAP amplitude in the distal segment of the trunk (**Fig. 4b**). Conversely, the  
 262 width of the bAP (measured 2 mV above baseline) increased in both the tuft and trunk with  
 263 length (**Fig. 4c**). While waveform broadening is a natural consequence of passive filtering  
 264 along dendrites, the sustained voltage in the distal trunk required active dendritic

265 propagation. In the reduced model, this active propagation in the apical trunk was mediated  
266 primarily by voltage-gated  $\text{Na}^+$  channels. Removing these channels caused a substantial  
267 reduction in peak voltage and width of the depolarization in the distal trunk, and importantly  
268 also abolished the trend of increasing tuft voltages with longer dendritic trunks (**Fig. 4d,e**).  
269 More generally, active propagation caused bAPs to be larger and broader at all distances  
270 along a long dendrite compared to the same absolute distances in shorter dendrites  
271 (**Supplementary Figure 7**). Consequently, when comparing the final positions along the  
272 trunk, the peak voltage is only marginally smaller in long dendrites despite the larger  
273 distance from the soma. This is not the case in a passive dendrite, where voltage  
274 attenuation depends on distance alone and is not sensitive to trunk length. We next tested  
275 how the specific distribution of active conductances affected the results. When all  
276 conductances were uniformly distributed along the apical trunk, the waveforms did not  
277 substantially change, and the enhanced voltage continued to trigger  $\text{Ca}^+$  plateaus only in  
278 neurons with long apical trunks (**Supplementary Figure 8**). We have also tested the specific  
279 contribution of the H-current ( $I_h$ ). Reducing  $I_h$  in the tuft had no effect on the length  
280 dependence of excitability. Reducing  $I_h$  in both the trunk and tuft resulted in the same  
281 qualitative finding, having only a marginal quantitative effect (**Supplementary Figure 9**).  
282 The general phenomenon of enhanced voltage propagation in longer dendrites resulting in  
283 amplification of tuft voltage thus did not depend on any of the particular model parameters  
284 above.

285  
286 While it might seem counterintuitive that peak tuft voltage is increasing when the trunk  
287 voltage is decreasing, we propose that the temporal broadening of the depolarization can at  
288 least partially account for this via a passive mechanism. Wider depolarizations allow the tuft  
289 compartment to charge to a higher voltage. The rate and peak value of tuft charging  
290 depends on the passive properties of the tuft. The peak value of depolarization and the rate  
291 of voltage change are proportional to membrane resistance ( $R_m$ ) and membrane capacitance  
292 ( $C_m$ ), respectively. The product of these two parameters gives the membrane time constant  
293 ( $\tau$ ). To illustrate this, we applied voltage-clamp to the end of the distal segment of the trunk  
294 and delivered 30 mV square voltage pulses of increasing width (**Fig. 5a**). Due to capacitive  
295 filtering, short voltage steps did not fully charge the tuft while wide voltage steps allowed  
296 voltage to reach the steady-state values commanded by  $R_m$ . To directly test the hypothesis  
297 that the relationship between trunk depolarization width and tuft membrane time constant  
298 caused the bAP amplitude in the tuft to increase with length, one could vary  $R_m$  by changing  
299  $g_{\text{leak}}$ . However, this would affect resting membrane potential and consequently alter voltage-  
300 dependent properties in the tuft. In order not to affect other variables in the model, we  
301 therefore chose to vary  $C_m$ . For a given value of depolarization amplitude and width,

302 increasing  $C_m$  (and therefore  $\tau$ ) in the tuft caused a reduction in the peak tuft voltage (**Fig.**  
 303 **5b**). These simulations show that the tuft time constant and the width of the bAP interact to  
 304 create a higher tuft depolarization with longer apical trunks.  
 305

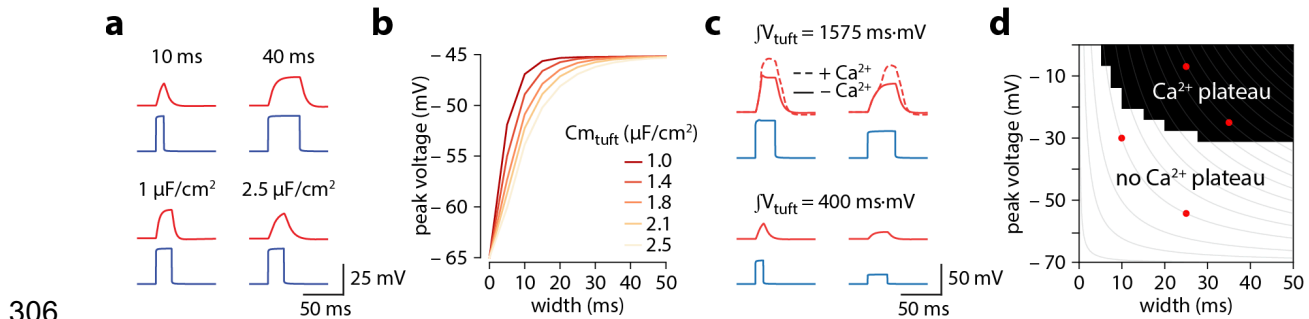

306

307 **Figure 5. Tuft voltage increases with trunk length due to the widening of bAPs.**

308 **a.** Different width voltage steps injected into the trunk (blue) under differing tuft membrane  
 309 capacitance conditions. Recorded tuft voltage in red. **b.** Peak voltage values reached in the tuft for a  
 310 range of trunk step widths and tuft capacitances. In the original model, tuft  $C_m \cong 1.75 \mu\text{F}/\text{cm}^2$ . **c.**  
 311 Same as in **a** but showing voltage steps of different width and amplitude with the same voltage  
 312 integral in the trunk. For large integrals (top), the tuft voltage crosses the threshold for a  $\text{Ca}^{2+}$  plateau,  
 313 while for smaller integrals (bottom) the voltage remains subthreshold. **d.** Voltage and width  
 314 combinations for square voltage steps in the distal trunk which result in a  $\text{Ca}^{2+}$  plateau in the tuft. Red  
 315 points represent the values used in **h**. Grey lines indicate width and amplitude combinations with  
 316 equal integral.

317

318 It has previously been suggested that axial resistance ( $R_a$ ) in the apical dendrite may  
 319 influence the backpropagation efficiency in dendrites and burstiness of tL5 neurons  
 320 (Fletcher & Williams, 2019). To test this hypothesis, we measured peak voltage and width in  
 321 the trunk and tuft for different trunk lengths under different  $R_a$  conditions. We found that peak  
 322 tuft voltage (and therefore burstiness) increased with increasing trunk  $R_a$ , reaching the  
 323 highest voltage near the reduced model's original value, and decreasing again for higher  
 324 values (**Supplementary Figure 10**). However, in these simulations burstiness always  
 325 increased with trunk length regardless of  $R_a$ . This indicates that, although important,  $R_a$  was  
 326 not the primary determinant for generating the length-dependent effect and if  $R_a$  indeed  
 327 correlates with length, these effects may combine to further enhance the tuft voltage in long  
 328 neurons.

329

330 Overall, the combination of increased width and a relatively small reduction in amplitude  
 331 resulted in a trunk voltage integral that increased with trunk length, thereby passing more  
 332 charge to the adjacent tuft compartment. However, if active backpropagation was reduced or

333 absent, the trunk integral and resulting tuft voltage decreased with length (**Fig.4d,e**). The  
334 peak tuft voltage approximately followed the integral of voltage in the distal trunk. To  
335 illustrate this, we applied voltage-clamp to the end of the trunk and injected square steps  
336 with a range of integrals obtained through various combinations of width and amplitude (**Fig.**  
337 **5c**). This revealed a zone above a critical trunk integral for which many different width and  
338 depolarization combinations were sufficient to evoke a  $\text{Ca}^{2+}$  plateau in the tuft (**Fig. 5d**).

## 339 **Discussion**

340 We made whole-cell patch-clamp recordings from layer 5 pyramidal neurons in primary and  
341 secondary visual cortices of mice. We found that both BAC firing and critical frequency ADP  
342 were almost entirely absent in the V2m neurons. Moreover, we observed that excitability  
343 was positively correlated with the length of the apical dendrite trunk across all neurons. To  
344 investigate the influence of apical trunk length on burstiness, we ran numerical simulations in  
345 compartmental biophysical models. Both morphologically detailed and reduced models  
346 showed that decreasing the apical trunk length resulted in reduced dendritic excitability.  
347 Further simulations revealed that this is due to an interplay between bAP width, amplitude  
348 and tuft impedance that depends critically on the presence of voltage-gated  $\text{Na}^+$  channels in  
349 the apical trunk. These results show that the same cell type, in closely related and adjacent  
350 cortical areas, and under the same operating conditions can have a very different  
351 computational repertoire. Our findings are thus inconsistent with the notion of canonical  
352 computations at the single cell level, suggesting they may not exist at the circuit level either.

353

354 Contrary to common assumptions, we observed considerable differences in the properties of  
355 ttL5 neurons across different brain regions. BAC firing, a dendritic operation, and critical  
356 frequency ADP, a measure of dendritic excitability, which are both critically dependent on  
357 dendritic  $\text{Ca}^{2+}$  plateaus, were almost completely absent in V2m. One key factor known to  
358 control dendritic excitability is inhibition (Perez-Garci et al., 2006). To determine the role of  
359 inhibition on the observed differences in excitability, we pharmacologically blocked  $\text{GABA}_B$   
360 receptors, thus creating more favourable conditions for BAC firing. To make comparisons  
361 rigorous, we have used the same experimental protocols and conditions across all  
362 experiments. Furthermore, to exclude bias in selecting ttL5 neurons, we have recorded only  
363 from two well-defined groups, identified either by their projection target or genetic label. We  
364 found similarly diminished excitability in both groups of V2m neurons.

365 The extracellular stimulation used to evoke BAC firing could in principle recruit different  
366 polysynaptic circuits in V1 and V2m, which could account for the difference. However, this  
367 would not explain the differences measured with the critical frequency paradigm using  
368 intracellular stimulation only. Another confounding variable affecting excitability could be the

369  $\text{Ca}^{2+}$  concentration in the extracellular solution. We have found the same results under  
370 different physiologically relevant concentrations. Altogether, these results show that  
371 decreased excitability of V2m tL5 neurons is a robust phenomenon.

372

373 Correlated with the differences in excitability, we found tL5 neurons in V2m to have  
374 significantly shorter apical trunks compared to V1 neurons. This data is consistent with  
375 recent structural MRI data (Fletcher & Williams, 2019) showing a thinner cortical mantle in  
376 more medial and posterior parts of the cortex. Using an existing widely used biophysical  
377 model designed to reproduce tL5 properties such as BAC firing (Hay et al., 2011), we found  
378 that the same model applied to a shorter morphology resulted in a loss of BAC firing,  
379 independently of  $\text{Ca}^{2+}$  channel density. This was also true in a reduced tL5 model with a  
380 simplified morphological structure (Bahl et al., 2012), which allowed for continuous  
381 exploration of apical trunk length. We found a sharp cut-off at a length of  $0.35 \lambda$  ( $\cong 350 \mu\text{m}$   
382 in model space), below which no BAC firing could be evoked. We note, however, that the  
383 reduced model is based on rat neurons and the apical trunk and oblique dendrites are  
384 pooled into the same compartment. It is also worth noting that, as the reduced model does  
385 not have a distinct compartment to represent the apical bifurcation, all  $\text{Ca}^{2+}$  channels are  
386 placed in the tuft compartment. Therefore, the numerical values of model length do not  
387 translate directly into apical trunk lengths for real mouse neurons.

388

389 Through our simulations, we identified voltage-gated  $\text{Na}^+$  channels in the apical dendrite as  
390 a key factor for reproducing our results. The  $\text{Na}^+$  channels control dendritic excitability by  
391 supporting active backpropagation, resulting in reduced attenuation over distance.  
392 Combined with a broadening of the bAP proportionally to trunk length (due to capacitive  
393 filtering), this caused longer neurons to have larger voltage integrals in the distal trunk,  
394 leading to greater charging of the tuft. Indeed, the peak tuft voltage depended on the amount  
395 of passive charging it experienced, which was determined by the membrane time constant in  
396 the tuft as well as by bAP width and amplitude. We hypothesised that, above a minimal  
397 threshold for peak trunk voltage, the primary determinant of peak tuft voltage is the time-  
398 averaged voltage in the trunk. Supporting this view, we found that the overall voltage integral  
399 was more important for triggering  $\text{Ca}^{2+}$  plateaus than the particular combination of  
400 depolarization width and amplitude.

401

402 Aside from dendritic length, our results do not exclude the involvement of other mechanisms  
403 to modulate excitability. For example, differences in axial resistance could influence the way  
404 voltage propagates along dendrites. While axial resistance indeed had a marked effect on  
405 the backpropagation of action potentials in our models, this was independent of trunk length

406 and thus cannot account for our finding. Variations in density and activation properties of  
407 other voltage-gated channels may also influence dendritic excitability. It is interesting to note  
408 that, in the presence of Na<sup>+</sup> channels, the bAP in neurons with longer trunks was larger and  
409 broader at every distance from the soma. This may be due to a cooperative effect of each  
410 trunk section on the sections both up- and downstream, with the voltage at each location  
411 decaying slower because of the more depolarised state of the remaining dendrite. Our data  
412 thus predicts that bAP width and amplitude measured at the same absolute distance from  
413 the soma differ across neurons with different apical trunk lengths.

414  
415 There are a few notable counterexamples to the principle observed here. For example, the  
416 human tL5 neuron was recently shown to have greater compartmentalization and reduced  
417 excitability compared to rat neurons despite being substantially longer (Beaulieu-Laroche et  
418 al., 2018). This may still be consistent with our predictions, as human tL5 neurons also had  
419 reduced ion channel densities, which we show to be crucial for the length-dependent  
420 enhancement. Furthermore, as the boosting effect of a broader depolarization is subject to  
421 saturation (when the depolarization is wide enough to fully charge the tuft), we would expect  
422 the positive effect of length on tuft voltage to not increase monotonically. Consequently,  
423 beyond a certain length the trunk voltage would attenuate to the point where it is no longer  
424 sufficient to trigger a Ca<sup>2+</sup> plateau. On the other end of the spectrum, layer 2/3 pyramidal  
425 neurons in rat barrel cortex have shorter apical trunks yet do show critical frequency ADP,  
426 although they do not exhibit spike bursts during BAC firing (M. E. Larkum, Waters,  
427 Sakmann, & Helmchen, 2007). It remains to be seen if the principle of length-dependent  
428 excitability generalizes to other species, or across more widespread cortical areas and cell  
429 types.

430  
431 There may be important clinical implications to gaining a better understanding of how  
432 variations in cortical thickness, and the resulting changes in neuronal morphology, affect the  
433 physiology and computational properties of pyramidal neurons. Indeed, altered cortical  
434 thickness has been implicated in several debilitating neurological diseases and mental  
435 health conditions. For example, cortical thinning is used as a biomarker for Alzheimer's  
436 disease (Dickerson et al., 2009) and correlates strongly with bipolar disorder (Hanford,  
437 Nazarov, Hall, & Sassi, 2016), while increased cortical thickness is present during  
438 development in individuals with autism (Khundrakpam, Lewis, Kostopoulos, Carbonell, &  
439 Evans, 2017). Interestingly, altered dendritic excitability has also been strongly implicated in  
440 several of these diseased conditions (Hall et al., 2015; Nanou & Catterall, 2018; Spratt et al.,  
441 2019). We uncovered a possible mechanistic link between cortical thickness and excitability,

442 highlighting a new potential avenue of study for understanding the pathophysiology in these  
443 conditions and raising the prospect of identifying intervention targets.

444

445 Our findings on dendritic excitability in tL5 neurons have wide-ranging implications for  
446 cortical computation. Feedback connectivity between cortical areas tends to target  
447 superficial layers while feedforward input favours basal dendrites (Coogan & Burkhalter,  
448 1990; Rockland & Pandya, 1979). BAC firing is believed to play a major role in integrating  
449 these two pathways to modulate sensory perception (Takahashi, Oertner, Hegemann, &  
450 Larkum, 2016) and to enable brain-wide learning algorithms that would otherwise be  
451 intractable (Guerguiev, Lillicrap, & Richards, 2017; Sacramento, Ponte Costa, Bengio, &  
452 Senn, 2018). This is particularly relevant in higher order cortical areas, which are more likely  
453 to process brain-wide feedback to integrate convergent multisensory, motor and cognitive  
454 signals (Freedman & Ibos, 2018). However, we show that, at least within the secondary  
455 visual cortex, different operations must be implementing the multimodal integration of top-  
456 down and bottom-up signals.

457

458 Our findings thus challenge the commonly held notion that the neocortex is composed of  
459 canonical circuits performing stereotyped computations on different sets of inputs across the  
460 brain (Douglas & Martin, 2004; Harris & Shepherd, 2015; Markram et al., 2015; Mountcastle,  
461 1997). The heterogeneity of operating modes may expand the ability of cortical areas to  
462 specialize in the computations that are required for processing their particular set of inputs,  
463 at the cost of reduced flexibility in generalizing to other types of input. It may also imply that  
464 the non-linear operations performed through  $Ca^{2+}$  plateaus and BAC firing may not be  
465 required outside primary sensory cortices, perhaps because in these regions the input  
466 hierarchy is less defined. It may therefore be more important to maintain equal weighting  
467 between different sensory modalities and rely on other mechanisms to change the weights  
468 according to the reliability of each input. With such simple morphological adjustments  
469 capable of generating a wide range of possible operations, the brain undoubtedly leverages  
470 the array of available computations to improve cognitive processing.

471

## 472 **Materials and Methods**

473

### 474 **Animals**

475 All animal experiments were prospectively approved by the local ethics panel of the Francis  
476 Crick Institute (previously National Institute for Medical Research) and the UK Home Office  
477 under the Animals (Scientific Procedures) Act 1986 (PPL: 70/8935). Wild-type and  
478 transgenic male mice were used. Tg (Colgalt2-Cre)NF107Gsat (MGI:5311719, referred to  
479 as Glt) and Tg (Rbp4-Cre)KL100Gsat (MGI:4367067, referred to as Rbp4) lines created  
480 through the Gensat project (Gerfen, Paletzki, & Heintz, 2013; Groh et al., 2010) were  
481 crossed with the Ai14 reporter line expressing tdTomato (MGI:3809524). Animals were  
482 housed in individually ventilated cages under a normal 12-hour light/dark cycle.

483

### 484 **Surgical procedures**

485 Surgeries were performed on mice aged 3–7 weeks using aseptic technique under  
486 isoflurane (2–4%) anaesthesia. Following induction of anaesthesia, animals were  
487 subcutaneously injected with a mixture of meloxicam (2 mg/kg) and buprenorphine (0.1  
488 mg/kg). During surgery, the animals were head-fixed in a stereotactic frame and a small hole  
489 (0.5–0.7 mm) was drilled in the bone above the injection site. Alexa Fluor 488-conjugated  
490 Cholera toxin subunit B (CTB, 0.8% w/v, Invitrogen) was injected using a glass pipette with  
491 a Nanoject II (Drummond Scientific) delivery system at a rate of 0.4 nL/s. Injections of 100–  
492 200 nL were targeted to the lateral posterior (LP) thalamic nucleus, with stereotactic  
493 coordinates: 2.2–2.5 mm posterior to bregma, 1.45 lateral of the sagittal suture, 2.45 mm  
494 deep from the cortical surface. To reduce backflow, the pipette was left in the brain  
495 approximately 5 minutes after completion of the injection before being slowly retracted.

496

### 497 **Slice preparation**

498 Male mice (6–12 weeks old) were deeply anaesthetised with isoflurane and decapitated. In  
499 mice that were injected with CTB, this occurred at least 3 weeks after the injection. The brain  
500 was rapidly removed and placed in oxygenated ice-cold slicing ACSF containing (in mM):  
501 125 sucrose, 62.5 NaCl, 2.5 KCl, 1.25 NaH<sub>2</sub>PO<sub>4</sub>, 26 NaHCO<sub>3</sub>, 2 MgCl<sub>2</sub>, 1 CaCl<sub>2</sub>, 25  
502 dextrose; osmolarity 340–350 mOsm. Coronal slices (300 µm thick) containing visual cortex  
503 were prepared using a vibrating blade microtome (Leica VT1200S or Campden 7000smz-2).  
504 Slices were immediately transferred to a submerged holding chamber with regular ACSF  
505 containing (in mM): 125 NaCl, 2.5 KCl, 1.25 NaH<sub>2</sub>PO<sub>4</sub>, 26 NaHCO<sub>3</sub>, 1 MgCl<sub>2</sub>, 1.5 or 2 CaCl<sub>2</sub>,  
506 25 dextrose; osmolarity 308–312 mOsm. The holding chamber was held in a water bath at  
507 35 °C for the first 30–60 min after slicing and was kept at room temperature (22 °C) for the



508 remaining time (up to 12 hours) after that. All solutions and chambers were continuously  
509 bubbled with carbogen (95% O<sub>2</sub> / 5% CO<sub>2</sub>).

510

### 511 Electrophysiology

512 After the 35 °C incubation period, individual slices were transferred from the holding  
513 chamber to the recording chamber, where they were perfused at a rate of ~6 mL/min with  
514 regular ACSF (see above) continuously bubbled with carbogen and heated to 35 ± 1 °C.  
515 Borosilicate thick-walled glass recording electrodes (3-6 MΩ) were filled with intracellular  
516 solution containing (in mM): 115 CH<sub>3</sub>KO<sub>3</sub>S, 5 NaCl, 3 MgCl<sub>2</sub>, 10 HEPES, 0.05 EGTA, 3  
517 Na<sub>2</sub>ATP, 0.4 NaGTP, 5 K<sub>2</sub>-phosphocreatine, 0.5% w/v biocytin hydrochloride (Sigma), 50  
518 μM Alexa Fluor 488 hydrazide (Invitrogen); osmolarity 290-295 mOsm; pH 7.3. Visually  
519 guided whole-cell patch-clamp recordings were targeted to neurons in L5 of medial V2  
520 (V2m) and V1 that were fluorescently labelled with either CTB or with tdTomato (for Glt25d2-  
521 Cre mice), to ensure that the recordings were restricted to tL5 neurons. Visual areas were  
522 defined based on approximate stereotactic coordinates (Franklin & Paxinos, 2007). All  
523 recordings were made in current-clamp mode. Extracellular monopolar stimulation was  
524 achieved by passing a DC current pulse (0.1-1 ms, 20-320 μA) through a glass patch-clamp  
525 pipette with a broken tip (~20 μm diameter) using a constant current stimulator (Digitimer  
526 DS3). Current was passed between two silver / silver chloride (Ag/AgCl) wires: one inside  
527 the pipette, which was filled with recording ACSF, and the other coiled around the outside of  
528 the pipette. In experiments using extracellular stimulation, 1 μM CGP52432 was added to  
529 the ACSF.

### 530 Immunohistochemistry and morphological reconstructions

531 After recording, slices were fixed overnight at 4 °C in a 4% formaldehyde solution and were  
532 subsequently kept in PBS. For immunohistochemical detection, the fixed slices were first  
533 incubated for 1-2 hours at room temperature in blocking solution containing 0.5% Triton X-  
534 100 and 5% Normal Goat Serum (NGS) in PBS. Slices were then washed twice (10 min  
535 each) in PBS and incubated overnight in a staining solution containing 0.05% Triton X-100,  
536 0.5% NGS, DyLight 594-conjugated streptavidin (2 μg/ml). Slices were then washed in PBS  
537 (3 times, 5 min each) and stained with DAPI (5 μg/ml) for 10 min. After another wash (3  
538 times, 5 min each), slices were mounted on glass slides and images were acquired with a  
539 confocal microscope (Leica SP5, objective: 20x/0.7NA or 10x/0.4NA, pinhole size: 1 airy  
540 unit). The images were used to reconstruct the neurons with Neurolucida 360 (MBF  
541 bioscience).

542

### 543 Data acquisition and analysis

544 Recorded signals were amplified and low-pass filtered through an 8 kHz Bessel filter using a  
545 MultiClamp 700B amplifier (Molecular Devices). Filtered signals were then digitized at 20  
546 kHz with a National Instruments DAQ board (PCIe-6323). Acquisition and stimulus protocols  
547 were generated in Igor Pro with the Neuromatic software package (Rothman & Silver, 2018).  
548 Further analysis and data visualization were performed with custom macros and scripts  
549 written in Igor Pro and Matlab (MathWorks). Raincloud plots (consisting of a scatter plot, a  
550 box plot, and a kernel density plot) were generated in MATLAB using published scripts  
551 (Allen, Poggiali, Whitaker, Marshall, & Kievit, 2019). All box plots presented show the  
552 median, interquartile range, 2nd and 98th percentile of the dataset. Confocal images were  
553 processed with Fiji (<https://fiji.sc/>).

554

### 555 Modelling

556 Simulations were performed with the NEURON (Carnevale & Hines, 2006) simulation  
557 environment (7.7.1) embedded in Python 3.6. To model the consequences of morphological  
558 differences between V1 and V2m tL5 cells, we utilised existing models of tL5 pyramidal  
559 cells with either accurate morphological detail (biophysical model 3, cell #1 from Hay et al.  
560 2011 (Hay et al., 2011), referred to as detailed model) or simplified multicompartment  
561 morphologies (Ca<sup>2+</sup> enriched model 2 from Bahl et al. 2012 (Bahl et al., 2012), referred to  
562 as reduced model). To study the effect of morphology in the detailed model, biophysical  
563 model 3 from Hay et al. 2011 (Hay et al., 2011) was applied to the reconstructed morphology  
564 from one of our recorded tL5 neurons in V2m (which has a substantially shorter apical trunk  
565 than the morphology used in the original model). Each morphology contained low-voltage-  
566 activated (LVA) and high-voltage-activated (HVA) Ca<sup>2+</sup> channels located in a 100-200 µm  
567 long region around the main apical bifurcation.

568 Subsequent simulations using the reduced model were done by modifying only selected  
569 parameters described in the results, such as the length of the apical trunk compartment,  
570 leaving all other parameters unchanged. Briefly, this reduced model (Bahl et al., 2012) is  
571 divided into sections representing the soma, axon (hillock and initial segment, AIS), basal  
572 dendrites, apical trunk, and apical tuft. Active conductances are present in all compartments  
573 and include the following: hyperpolarization-activated cation (HCN) channels (basal  
574 dendrite, apical trunk, tuft), transient voltage-activated Na<sup>+</sup> (Na<sub>t</sub>) channels (soma, axon  
575 hillock, AIS, apical trunk, tuft), persistent voltage-activated Na<sup>+</sup> (Na<sub>p</sub>) channels (soma), fast  
576 voltage-activated K<sup>+</sup> (K<sub>fast</sub>) channels (soma, apical trunk, tuft), slow voltage-activated K<sup>+</sup>  
577 (K<sub>slow</sub>) channels (soma, apical trunk, tuft), muscarinic K<sup>+</sup> (K<sub>m</sub>) channels (soma), slow Ca<sup>2+</sup>  
578 (Ca<sub>s</sub>) channels (tuft), Ca<sup>2+</sup> dependent K<sup>+</sup> (K<sub>Ca</sub>) channels (tuft), and a Ca<sup>2+</sup> pump (tuft). The  
579 density of the K<sub>fast</sub> and K<sub>slow</sub> channels decays exponentially from the soma to the tuft. The  
580 density of Na<sub>t</sub> channels decays linearly from the soma to the tuft, while HCN channels

581 linearly increase in density. N.B. the tuft, but not the trunk, contains  $\text{Ca}^{2+}$  channels;  
582 consequently, there is no hotspot similar to the apical bifurcation in the detailed model.  
583 When varying trunk length,  $\text{Na}_t$ ,  $K_{\text{fast}}$ ,  $K_{\text{slow}}$ , and HCN conductances in each trunk segment  
584 were redistributed so as to take into account the new distance of each segment from the  
585 soma (thereby changing the total conductance in the trunk). All code will be available on  
586 GitHub after acceptance.

587

#### 588 Acknowledgements

589 We thank Arnd Roth and Alexandra Tran-Van-Minh for advice on modelling. We are grateful  
590 to Lee Fletcher, Arnd Roth, Alexandra Tran-Van-Minh, Michael Hausser and Anna Cappellini  
591 for helpful comments on the manuscript.

592

#### 593 Author contributions

594 A.R.G.: Designed and performed biological experiments, designed modelling experiments,  
595 analysed data, wrote the paper. A.L.: Designed and performed modelling experiments,  
596 analysed data. E.A.R.: Conceptualized research, designed experiments, acquired funding,  
597 wrote the paper.

598 All authors discussed the results and implications and commented on the manuscript at all  
599 stages. There are no competing interests.

600 All authors declare no financial or non-financial competing interest.

601

#### 602 Funding

603 A.R.G. was recipient of a Boehringer Ingelheim Fonds PhD Scholarship and a PhD  
604 scholarship from the Francis Crick Institute. E.A.R. is jointly funded by Wellcome and the  
605 Royal Society through a Sir Henry Dale Fellowship (104285/B/14/Z).

606

## 607 References

608

- 609 Allen, M., Poggiali, D., Whitaker, K., Marshall, T. R., & Kievit, R. A. (2019). Raincloud plots:  
610 a multi-platform tool for robust data visualization. *Wellcome Open Res*, *4*, 63.  
611 doi:10.12688/wellcomeopenres.15191.1
- 612 Bahl, A., Stemmler, M. B., Herz, A. V. M., & Roth, A. (2012). Automated optimization of a  
613 reduced layer 5 pyramidal cell model based on experimental data. *Journal of*  
614 *Neuroscience Methods*, *210* (1), 22-34. doi:10.1016/j.jneumeth.2012.04.006
- 615 Bastos, A. M., Usrey, W. M., Adams, R. A., Mangun, G. R., Fries, P., & Friston, K. J. (2012).  
616 Canonical microcircuits for predictive coding. *Neuron*, *76* (4), 695-711.  
617 doi:10.1016/j.neuron.2012.10.038
- 618 Beaulieu-Laroche, L., Toloza, E. H. S., van der Goes, M.-S., Lafourcade, M., Barnagian, D.,  
619 Williams, Z. M., . . . Harnett, M. T. (2018). Enhanced Dendritic Compartmentalization  
620 in Human Cortical Neurons. *Cell*, *175* (3), 643-651.e614.  
621 doi:10.1016/j.cell.2018.08.045
- 622 Braganza, O., & Beck, H. (2018). The Circuit Motif as a Conceptual Tool for Multilevel  
623 Neuroscience. *Trends Neurosci*, *41* (3), 128-136. doi:10.1016/j.tins.2018.01.002
- 624 Carlo, C. N., & Stevens, C. F. (2013). Structural uniformity of neocortex, revisited. *Proc Natl*  
625 *Acad Sci U S A*, *110* (4), 1488-1493. doi:10.1073/pnas.1221398110
- 626 Carnevale, N. T., & Hines, M. L. (2006). *The NEURON book*. Cambridge, UK ; New York:  
627 Cambridge University Press.
- 628 Coogan, T. A., & Burkhalter, A. (1990). Conserved patterns of cortico-cortical connections  
629 define areal hierarchy in rat visual cortex. *Experimental Brain Research*, *80* (1), 49-53.  
630 doi:10.1007/BF00228846
- 631 Dickerson, B. C., Bakkour, A., Salat, D. H., Feczko, E., Pacheco, J., Greve, D. N., . . . Buckner,  
632 R. L. (2009). The cortical signature of Alzheimer's disease: regionally specific cortical  
633 thinning relates to symptom severity in very mild to mild AD dementia and is detectable  
634 in asymptomatic amyloid-positive individuals. *Cerebral Cortex*, *19* (3), 497-510.  
635 doi:10.1093/cercor/bhn113
- 636 Douglas, R. J., & Martin, K. A. C. (2004). Neuronal Circuits of the Neocortex. *Annual Review*  
637 *of Neuroscience*, *27* (1), 419-451. doi:10.1146/annurev.neuro.27.070203.144152
- 638 Fletcher, L. N., & Williams, S. R. (2019). Neocortical Topology Governs the Dendritic  
639 Integrative Capacity of Layer 5 Pyramidal Neurons. *Neuron*, *101* (1), 76-90.e74.  
640 doi:10.1016/j.neuron.2018.10.048
- 641 Franklin, K. B. J., & Paxinos, G. (2007). *Paxinos and Franklin's The mouse brain in stereotaxic*  
642 *coordinates* (3rd edition. ed.). Amsterdam: Academic Press, an imprint of Elsevier.
- 643 Freedman, D. J., & Ibos, G. (2018). An Integrative Framework for Sensory, Motor, and  
644 Cognitive Functions of the Posterior Parietal Cortex. *Neuron*, *97* (6), 1219-1234.  
645 doi:10.1016/j.neuron.2018.01.044
- 646 Gerfen, Charles R., Paletzki, R., & Heintz, N. (2013). GENSAT BAC Cre-Recombinase Driver  
647 Lines to Study the Functional Organization of Cerebral Cortical and Basal Ganglia  
648 Circuits. *Neuron*, *80* (6), 1368-1383. doi:10.1016/j.neuron.2013.10.016
- 649 Gidon, A., Zolnik, T. A., Fidzinski, P., Bolduan, F., Papoutsi, A., Poirazi, P., . . . Larkum, M. E.  
650 (2020). Dendritic action potentials and computation in human layer 2/3 cortical  
651 neurons. *Science*, *367* (6473), 83-87. doi:10.1126/science.aax6239
- 652 Groh, A., Meyer, H. S., Schmidt, E. F., Heintz, N., Sakmann, B., & Krieger, P. (2010). Cell-  
653 Type Specific Properties of Pyramidal Neurons in Neocortex Underlying a Layout that  
654 Is Modifiable Depending on the Cortical Area. *Cerebral Cortex*, *20* (4), 826-836.  
655 doi:10.1093/cercor/bhp152
- 656 Guerguiev, J., Lillicrap, T. P., & Richards, B. A. (2017). Towards deep learning with  
657 segregated dendrites. *eLife*, *6*. doi:10.7554/eLife.22901

- 658 Hall, A. M., Throesch, B. T., Buckingham, S. C., Markwardt, S. J., Peng, Y., Wang, Q., . . .  
659 Roberson, E. D. (2015). Tau-dependent Kv4.2 depletion and dendritic  
660 hyperexcitability in a mouse model of Alzheimer's disease. *J Neurosci*, *35* (15), 6221-  
661 6230. doi:10.1523/JNEUROSCI.2552-14.2015
- 662 Hanford, L. C., Nazarov, A., Hall, G. B., & Sassi, R. B. (2016). Cortical thickness in bipolar  
663 disorder: a systematic review. *Bipolar Disord*, *18* (1), 4-18. doi:10.1111/bdi.12362
- 664 Harris, K. D., & Shepherd, G. M. G. (2015). The neocortical circuit: themes and variations.  
665 *Nature Neuroscience*, *18* (2), 170-181. doi:10.1038/nn.3917
- 666 Hawkins, J., Ahmad, S., & Cui, Y. (2017). A Theory of How Columns in the Neocortex Enable  
667 Learning the Structure of the World. *Front Neural Circuits*, *11*, 81.  
668 doi:10.3389/fncir.2017.00081
- 669 Hay, E., Hill, S., Schürmann, F., Markram, H., & Segev, I. (2011). Models of Neocortical Layer  
670 5b Pyramidal Cells Capturing a Wide Range of Dendritic and Perisomatic Active  
671 Properties. *PLOS Computational Biology*, *7* (7). doi:10.1371/journal.pcbi.1002107
- 672 Jarsky, T., Roxin, A., Kath, W. L., & Spruston, N. (2005). Conditional dendritic spike  
673 propagation following distal synaptic activation of hippocampal CA1 pyramidal  
674 neurons. *Nature Neuroscience*, *8* (12), 1667-1676. doi:10.1038/nn1599
- 675 Khundrakpam, B. S., Lewis, J. D., Kostopoulos, P., Carbonell, F., & Evans, A. C. (2017).  
676 Cortical Thickness Abnormalities in Autism Spectrum Disorders Through Late  
677 Childhood, Adolescence, and Adulthood: A Large-Scale MRI Study. *Cerebral Cortex*,  
678 *27* (3), 1721-1731. doi:10.1093/cercor/bhx038
- 679 Larkum, M. (2013). A cellular mechanism for cortical associations: an organizing principle for  
680 the cerebral cortex. *Trends in Neurosciences*, *36* (3), 141-151.  
681 doi:10.1016/j.tins.2012.11.006
- 682 Larkum, M. E., Kaiser, K. M. M., & Sakmann, B. (1999). Calcium electrogenesis in distal  
683 apical dendrites of layer 5 pyramidal cells at a critical frequency of back-propagating  
684 action potentials. *Proceedings of the National Academy of Sciences*, *96* (25), 14600-  
685 14604. doi:10.1073/pnas.96.25.14600
- 686 Larkum, M. E., Waters, J., Sakmann, B., & Helmchen, F. (2007). Dendritic spikes in apical  
687 dendrites of neocortical layer 2/3 pyramidal neurons. *J Neurosci*, *27* (34), 8999-9008.  
688 doi:10.1523/JNEUROSCI.1717-07.2007
- 689 Larkum, M. E., Zhu, J. J., & Sakmann, B. (1999). A new cellular mechanism for coupling  
690 inputs arriving at different cortical layers. *Nature*, *398* (6725), 338-341.  
691 doi:10.1038/18686
- 692 London, M., & Häusser, M. (2005). Dendritic Computation. *Annual Review of Neuroscience*,  
693 *28* (1), 503-532. doi:10.1146/annurev.neuro.28.061604.135703
- 694 Mainen, Z. F., & Sejnowski, T. J. (1996). Influence of dendritic structure on firing pattern in  
695 model neocortical neurons. *Nature*, *382* (6589), 363-366. doi:10.1038/382363a0
- 696 Markram, H., Muller, E., Ramaswamy, S., Reimann, M. W., Abdellah, M., Sanchez, C. A., . . .  
697 Schürmann, F. (2015). Reconstruction and Simulation of Neocortical Microcircuitry.  
698 *Cell*, *163* (2), 456-492. doi:10.1016/j.cell.2015.09.029
- 699 Miller, K. D. (2016). Canonical computations of cerebral cortex. *Current Opinion in*  
700 *Neurobiology*, *37*, 75-84. doi:10.1016/j.conb.2016.01.008
- 701 Mountcastle, V. B. (1997). The columnar organization of the neocortex. *Brain*, *120* (4), 701-  
702 722. doi:10.1093/brain/120.4.701
- 703 Nanou, E., & Catterall, W. A. (2018). Calcium Channels, Synaptic Plasticity, and  
704 Neuropsychiatric Disease. *Neuron*, *98* (3), 466-481. doi:10.1016/j.neuron.2018.03.017
- 705 Perez-Garci, E., Gassmann, M., Bettler, B., & Larkum, M. E. (2006). The GABAB1b isoform  
706 mediates long-lasting inhibition of dendritic Ca<sup>2+</sup> spikes in layer 5 somatosensory  
707 pyramidal neurons. *Neuron*, *50* (4), 603-616. doi:10.1016/j.neuron.2006.04.019

- 708 Rockland, K. S., & Pandya, D. N. (1979). Laminar origins and terminations of cortical  
709 connections of the occipital lobe in the rhesus monkey. *Brain Research*, 179 (1), 3-20.  
710 doi:10.1016/0006-8993(79)90485-2
- 711 Rothman, J. S., & Silver, R. A. (2018). NeuroMatic: An Integrated Open-Source Software  
712 Toolkit for Acquisition, Analysis and Simulation of Electrophysiological Data. *Front*  
713 *Neuroinform*, 12, 14. doi:10.3389/fninf.2018.00014
- 714 Sacramento, J., Ponte Costa, R., Bengio, Y., & Senn, W. (2018). Dendritic cortical  
715 microcircuits approximate the backpropagation algorithm. In S. Bengio, H. Wallach, H.  
716 Larochelle, K. Grauman, N. Cesa-Bianchi, & R. Garnett (Eds.), *Advances in Neural*  
717 *Information Processing Systems 31* (pp. 8721-8732): Curran Associates, Inc.
- 718 Schaefer, A. T., Larkum, M. E., Sakmann, B., & Roth, A. (2003). Coincidence Detection in  
719 Pyramidal Neurons Is Tuned by Their Dendritic Branching Pattern. *Journal of*  
720 *Neurophysiology*, 89 (6), 3143-3154. doi:10.1152/jn.00046.2003
- 721 Shai, A. S., Anastassiou, C. A., Larkum, M. E., & Koch, C. (2015). Physiology of Layer 5  
722 Pyramidal Neurons in Mouse Primary Visual Cortex: Coincidence Detection through  
723 Bursting. *PLOS Computational Biology*, 11 (3). doi:10.1371/journal.pcbi.1004090
- 724 Shipp, S. (2016). Neural Elements for Predictive Coding. *Front Psychol*, 7, 1792.  
725 doi:10.3389/fpsyg.2016.01792
- 726 Spratt, P. W. E., Ben-Shalom, R., Keeshen, C. M., Burke, K. J., Jr., Clarkson, R. L., Sanders,  
727 S. J., & Bender, K. J. (2019). The Autism-Associated Gene Scn2a Contributes to  
728 Dendritic Excitability and Synaptic Function in the Prefrontal Cortex. *Neuron*, 103 (4),  
729 673-685 e675. doi:10.1016/j.neuron.2019.05.037
- 730 Spruston, N. (2008). Pyramidal neurons: dendritic structure and synaptic integration. *Nat Rev*  
731 *Neurosci*, 9 (3), 206-221. doi:10.1038/nrn2286
- 732 Takahashi, N., Oertner, T. G., Hegemann, P., & Larkum, M. E. (2016). Active cortical  
733 dendrites modulate perception. *Science*, 354 (6319), 1587-1590.  
734 doi:10.1126/science.aah6066
- 735 van Ooyen, A., Duijnhouwer, J., Remme, M. W. H., & van Pelt, J. (2002). The effect of  
736 dendritic topology on firing patterns in model neurons. *Network (Bristol, England)*, 13  
737 (3), 311-325.
- 738 Vetter, P., Roth, A., & Hausser, M. (2001). Propagation of action potentials in dendrites  
739 depends on dendritic morphology. *J Neurophysiol*, 85 (2), 926-937.  
740 doi:10.1152/jn.2001.85.2.926  
741  
742

743 **Supplementary figures**

744  
745  
746  
747

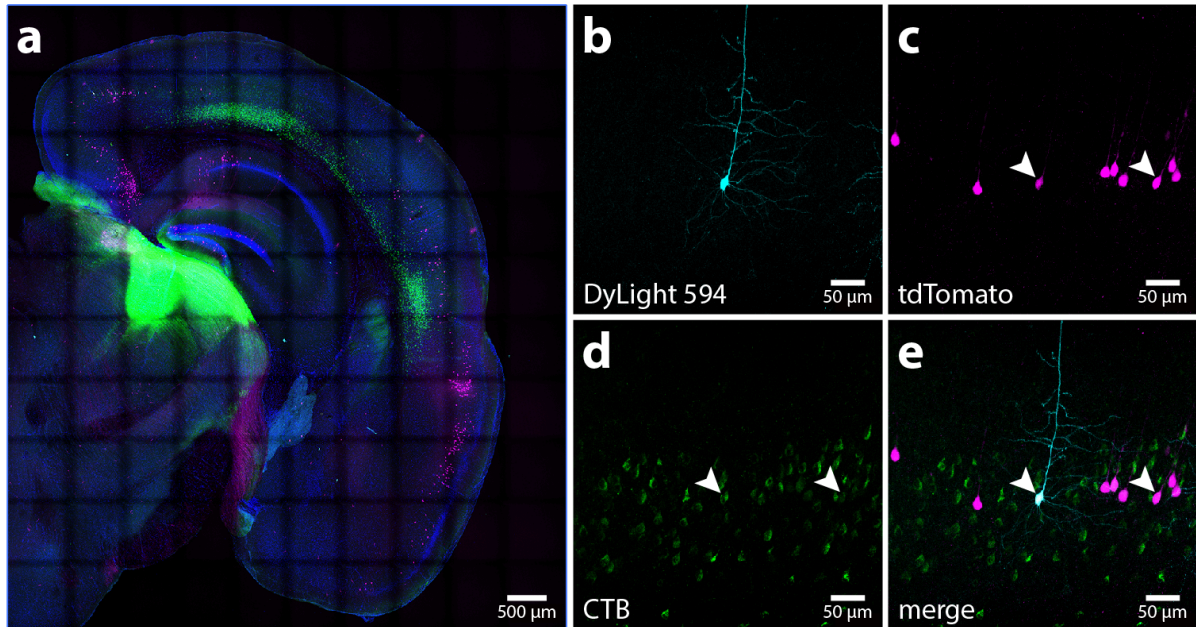

**Supplementary Figure 1. Confocal images from a Glt25d2-Cre mouse injected with CTB-Alexa Fluor 488 in LP.** **a.** Coronal slice of one hemisphere containing visual cortex, showing the injection site and retrogradely labelled neurons (green), tdTomato-expressing Glt25d2-Cre neurons (magenta), a DAPI stain (blue), and neurons that have been filled with biocytin during intracellular recordings and stained with DyLight 594 (cyan). **b.** Biocytin-filled ttL5 neuron in V2m. **c.** Neighbouring tdTomato-expressing Glt25d2-Cre neurons. **d.** CTB-labelled L5 neurons projecting to LP. **e.** Composite image of the above. Arrowheads highlight two example cells labelled by both tdTomato and CTB.

759  
760  
761

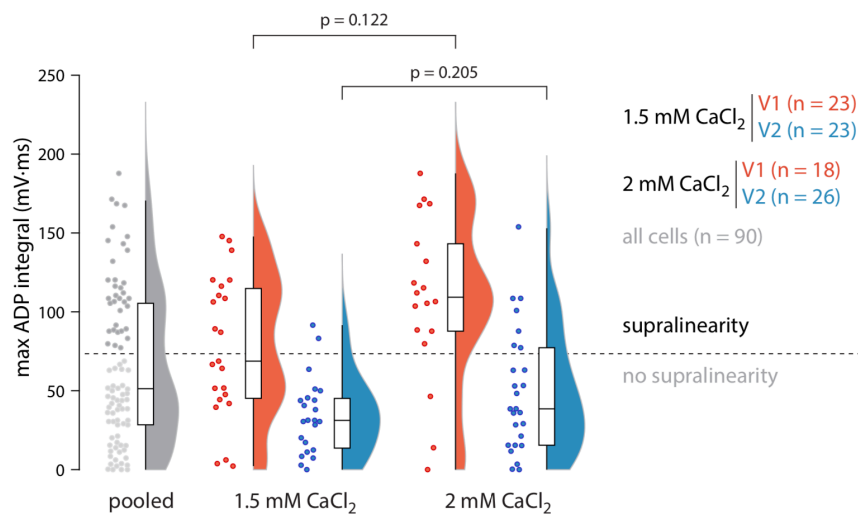

762  
763  
764  
765  
766  
767

**Supplementary Figure 2.** Maximum ADP integral for all cells split by recording ACSF containing either 1.5 or 2 mM CaCl<sub>2</sub>. p values for two-sample Kolmogorov-Smirnov test.

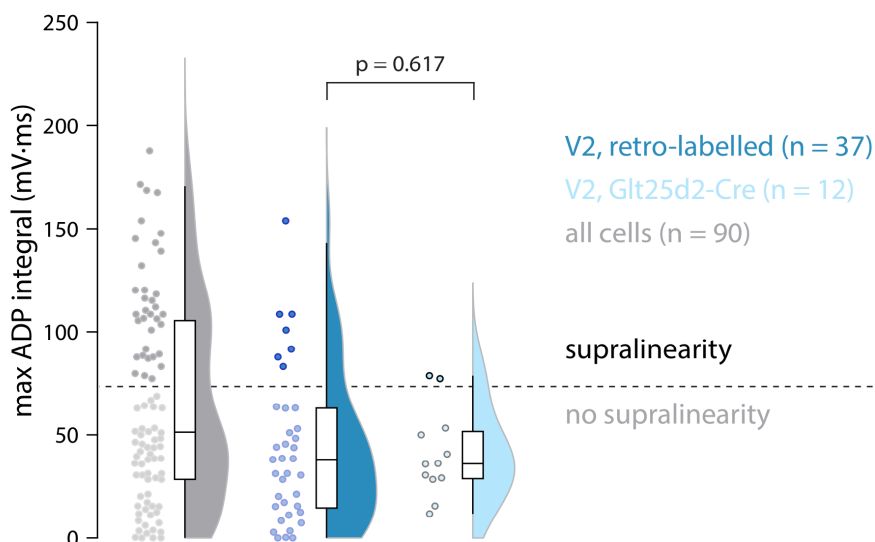

768  
769  
770  
771  
772  
773  
774  
775  
776

**Supplementary Figure 3.** Maximum ADP integral for all cells including V1 (grey), retro-labelled cells recorded from V2m (dark blue), and V2m cells labelled in the Glt2-Cre mouse line (light blue). p value for two-sample Kolmogorov-Smirnov test.



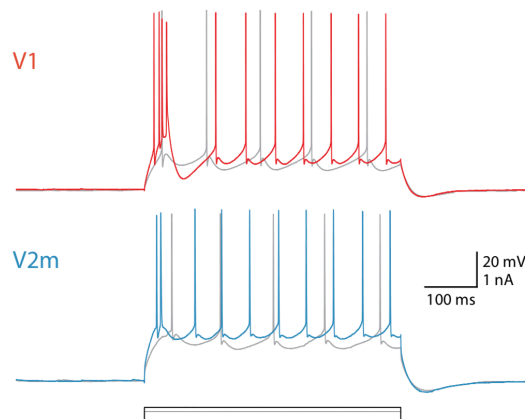

777  
778  
779  
780  
781  
782  
783

**Supplementary Figure 4.** Representative voltage traces for V1 and V2m neurons in response to 500 ms wide depolarizing current steps. Stimulation at 60 pA (grey) and 180 pA (coloured or black) above rheobase (200 pA for both).

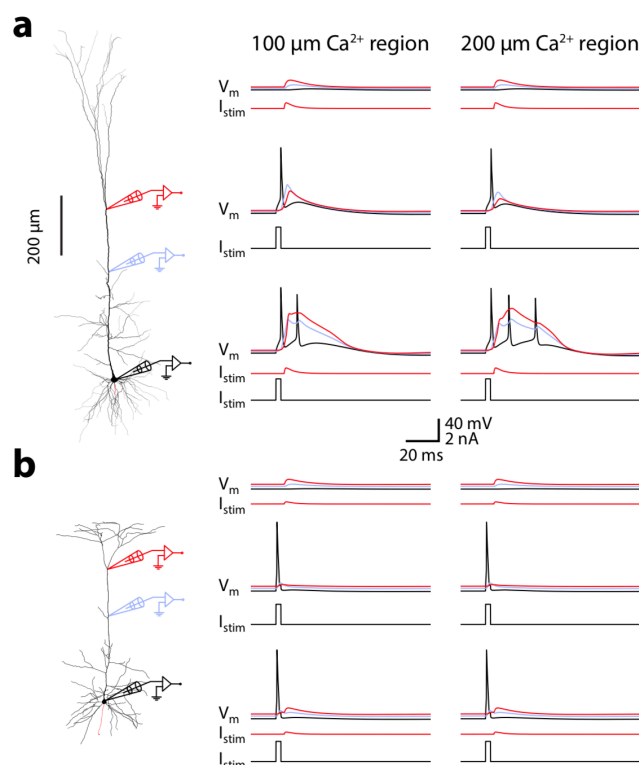

784  
785  
786  
787  
788  
789  
790  
791  
792

**Supplementary Figure 5. Ca<sup>2+</sup> hot-spot size does not affect excitability.**

**a.** Voltage traces recorded from different parts of the long neuronal morphology containing either a 200 μm (as in the original), or 100 μm long Ca<sup>2+</sup> region in the distal apical trunk. **b.** Same as in a, but for the shorter morphology.

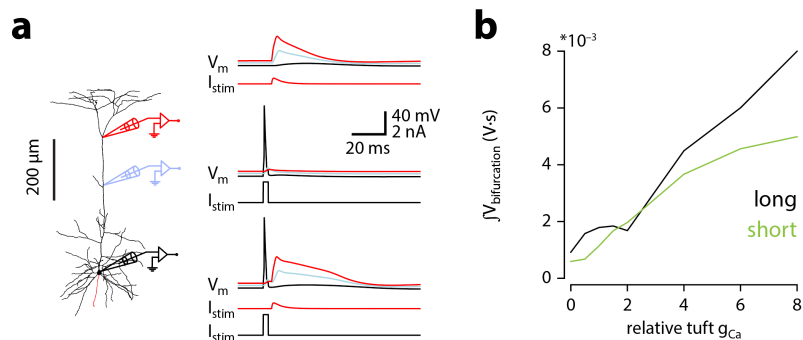

793  
794  
795  
796  
797  
798  
799

**Supplementary Figure 6. Large current injections to the nexus of short model cells can trigger calcium plateaus.**

Same as in Fig. 3a & b, but for the short morphology using the same dendritic current injection as in the long morphology (0.5 nA).

800  
801

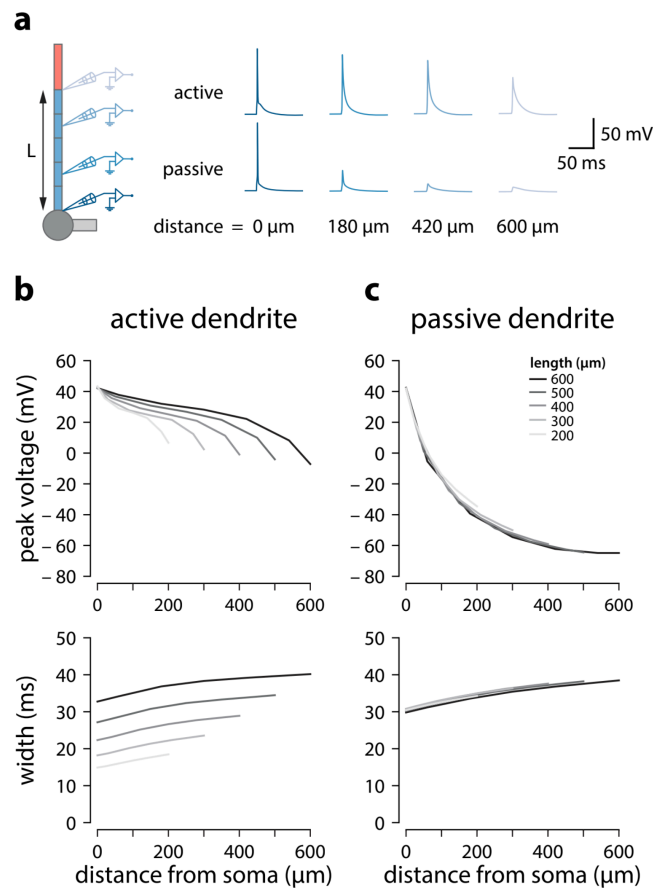

802  
803  
804  
805  
806  
807  
808  
809  
810  
811  
812  
813  
814  
815  
816  
817  
818

**Supplementary Figure 7. Backpropagation of APs in active and passive trunks of different length.**

**a.** Backpropagation of a somatic spike elicited through a single 3 ms wide 2 nA square current step at the soma in a model neuron with 600  $\mu\text{m}$  apical trunk length. Voltage recordings at different distances along the trunk. **b.** Peak voltage and width measured at different absolute distances (same relative) for active model neurons. Width was measured as the interval between the voltage values 2 mV above baseline membrane potential. Colours indicate models with different apical trunk lengths. N.B. At any given absolute distance from the soma, peak voltage and width of the bAP are larger when the apical trunk is longer. **c.** Same as in **b** but with all voltage-dependent conductances removed from the trunk and tuft compartments. N.B. voltage attenuation is independent of trunk length.

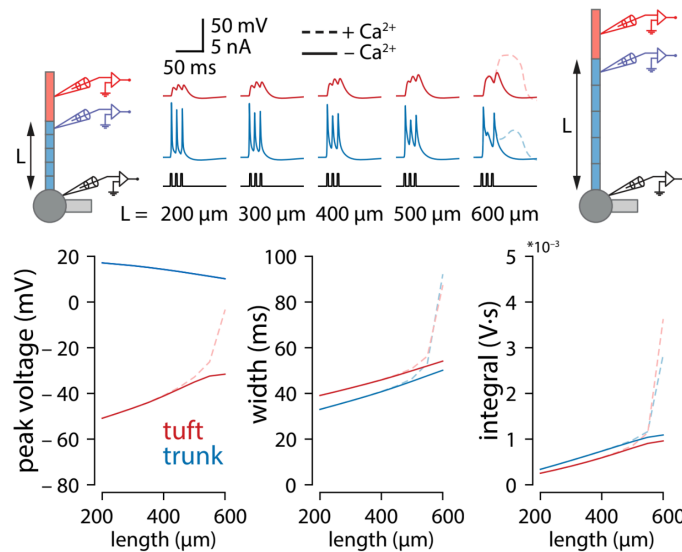

819  
820  
821  
822  
823  
824  
825

**Supplementary Figure 8. Tuft voltage increases with trunk length independently of conductance gradients.**

Same experiments as in Fig. 3a but with uniform distribution of all active conductances in the apical trunk. Total conductance was maintained for each channel.

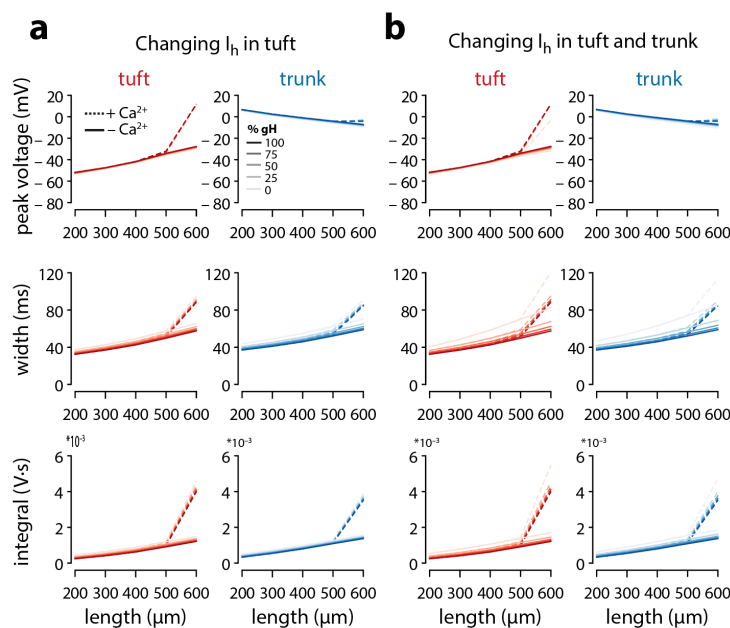

826  
827  
828  
829  
830  
831  
832  
833

**Supplementary Figure 9.  $I_h$  does not contribute to length dependent increase of excitability.**

**a.** Plots of peak voltage, width and integral of bAPs under different  $g_{HCN}$  (shades) in the tuft, both in the presence (solid) or absence (dashed) of  $Ca^{2+}$  channels. **b.** Same as **a**, but varying  $g_{HCN}$  in both tuft and trunk compartments.

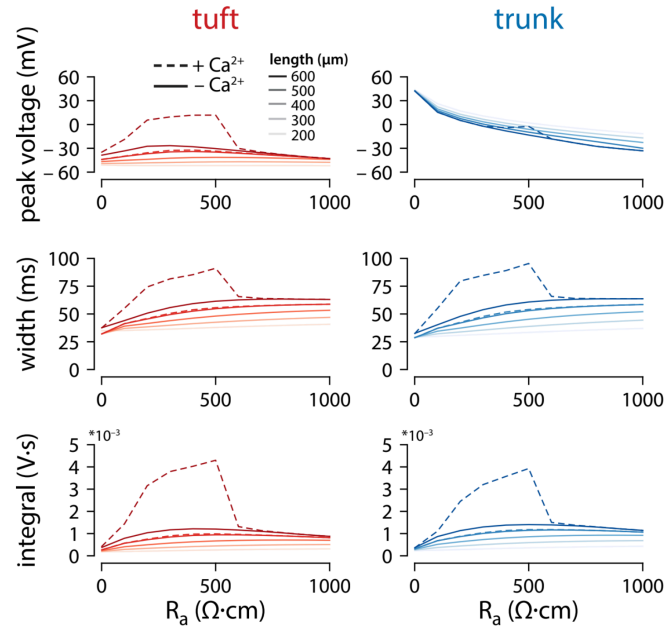

834  
835  
836  
837  
838  
839  
840  
841  
842  
843  
844  
845

**Supplementary Figure 10. Effect of axial resistance on voltage propagation.**

Plots of peak voltage, width, and voltage integral reached in the tuft and trunk for varying values of trunk length and axial resistance ( $R_a$ ). Default  $R_a \cong 382.22 \Omega\cdot\text{cm}$ . The stimulus and recording conditions were the same as in **Fig. 2a**, with 3 APs at 100 Hz triggered in the somatic compartment. Solid lines show simulations with  $g_{Ca} = 0$ , while dashed lines show the same simulations with the original  $g_{Ca} = 0.45 \text{ mS}/\text{cm}^2$ .
